# Supplementary material for: 2,5-Dithienylpyrrole (DTP) as a donor component in DTP–π–A organic sensitizers: photophysical and photovoltaic properties
Source: Royal Society of Chemistry journal article supplement (doi:10.1039/c4ra10342d), 2014-12-05
Supplement: c4ra10342d1.pdf [file c4ra10342d1.pdf]

## SUPPORTING INFORMATION

### **2,5-Dithienylpyrrole (DTP) as donor component in DTP- $\pi$ - A organic sensitizers: photophysical and photovoltaic properties**

Walid Sharmoukh,<sup>a,b,1</sup> Antonio Attanzio,<sup>c</sup> Eva Busatto,<sup>c</sup> Thibaud Etienne,<sup>a,b</sup> Stefano Carli,<sup>c</sup>  
Antonio Monari,<sup>a,b</sup> Xavier Assfeld,<sup>a,b</sup> Marc Beley,<sup>a,b</sup> Stefano Caramori,<sup>c\*</sup> and Philippe C. Gros<sup>a,b\*</sup>

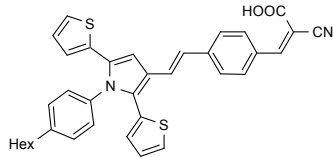

DTP1

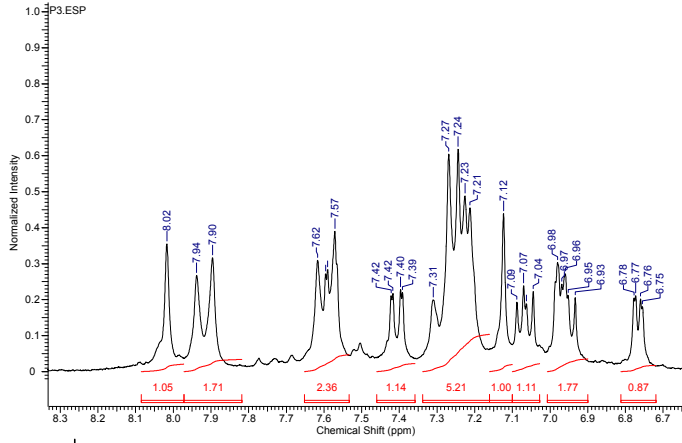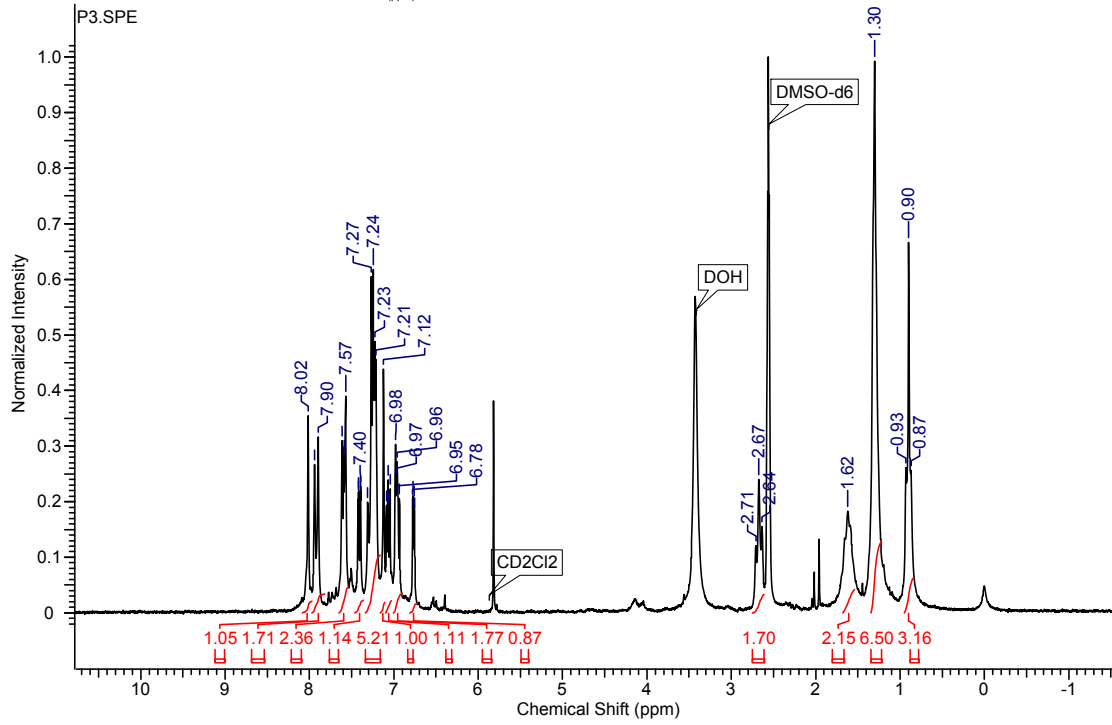

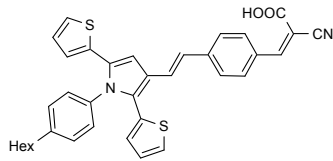

DTP1

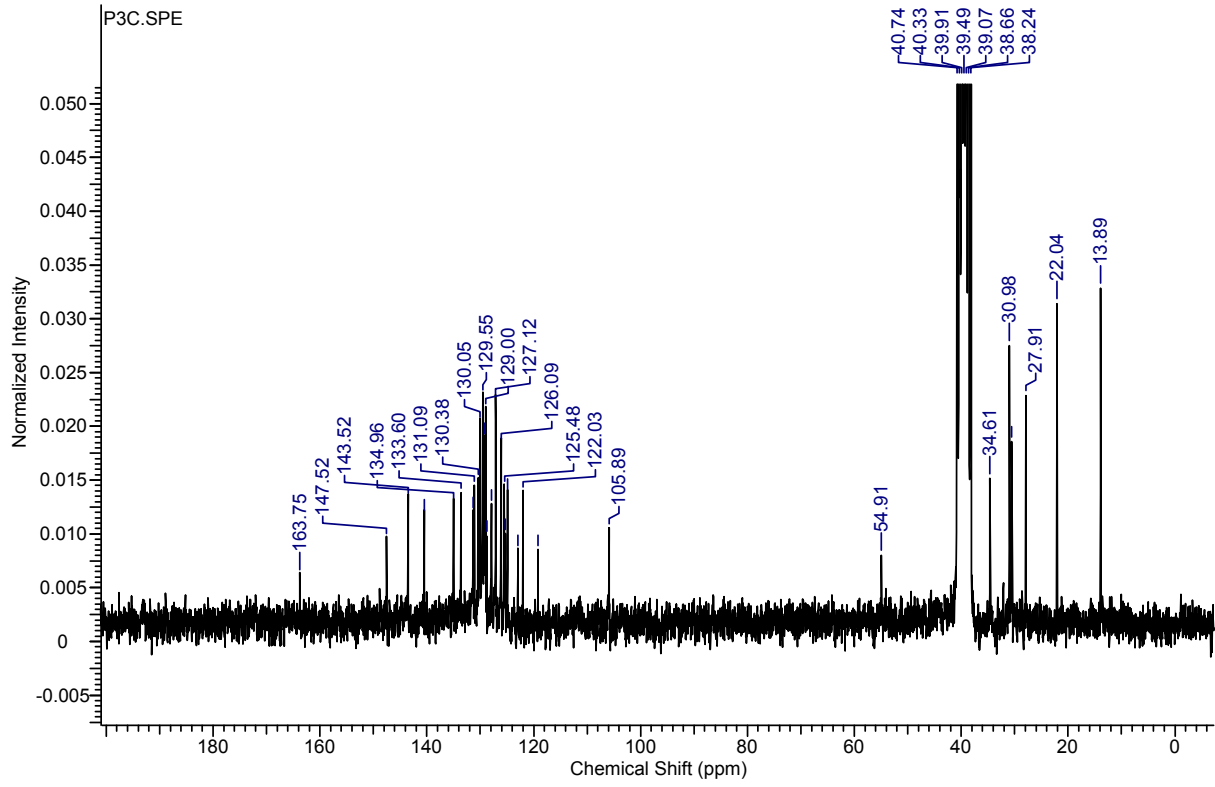

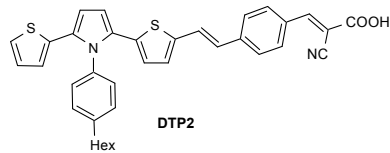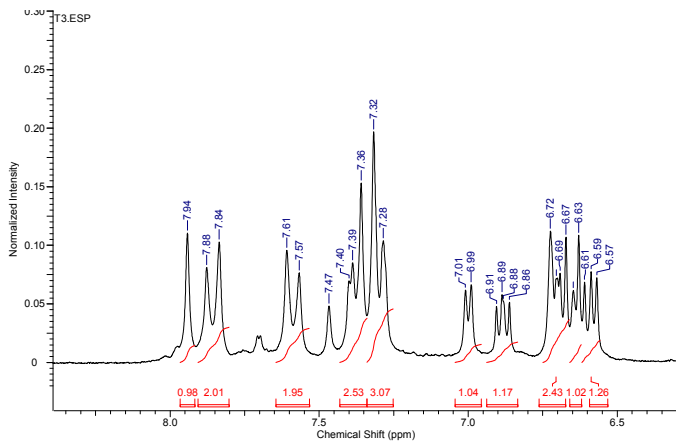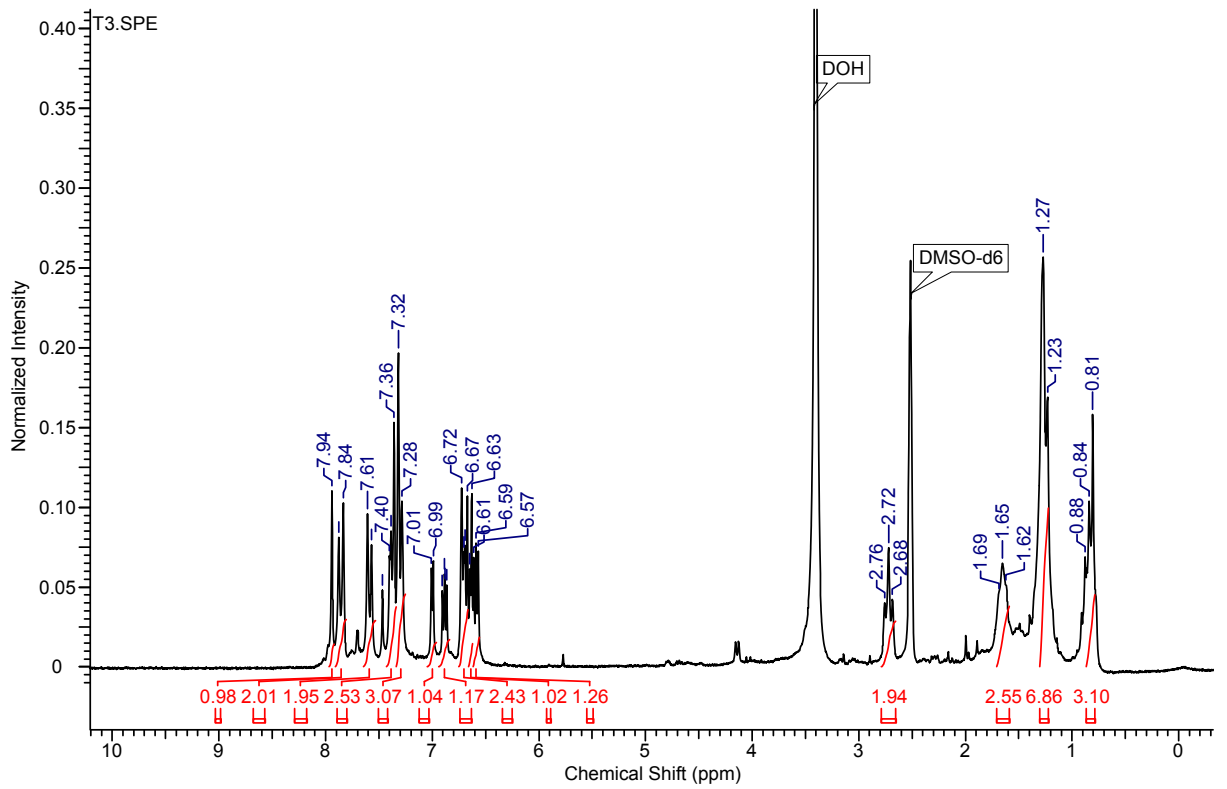

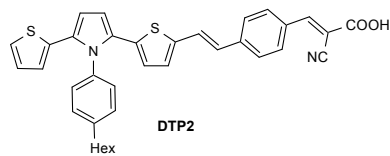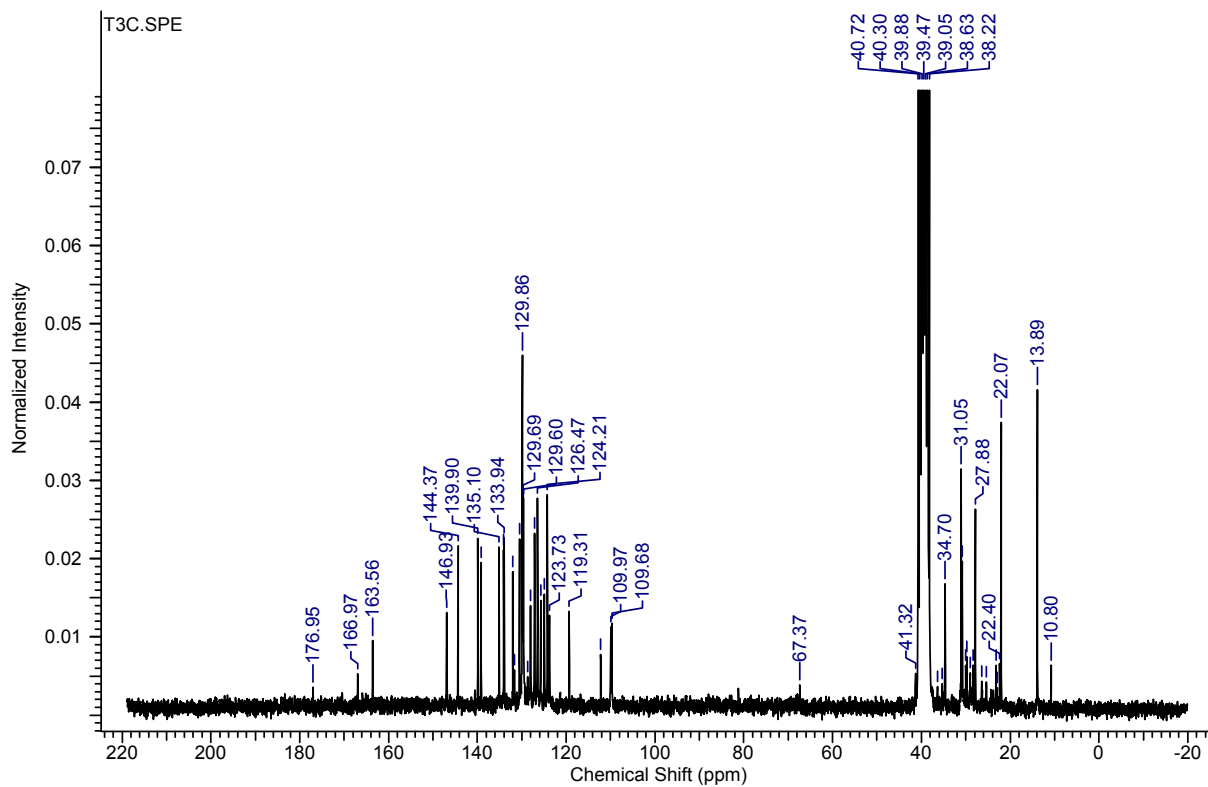

## Photophysics.

**DTP1** and **DTP2** are characterized by singlet excited state lifetimes  $< 2$  ns (1.8 ns for **DTP2** and 1 ns for **DTP1**) measured by TCSPC in the emission maximum of the dye in Dichloromethane, following 460 nm excitation.

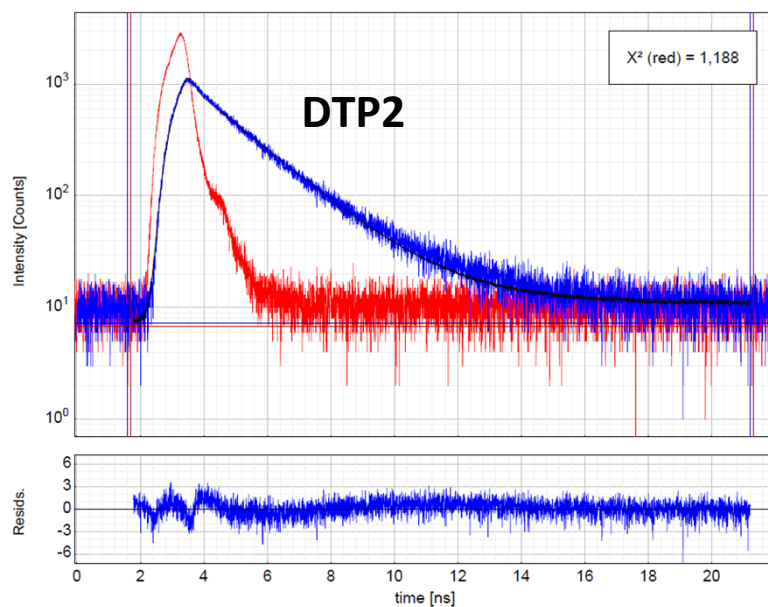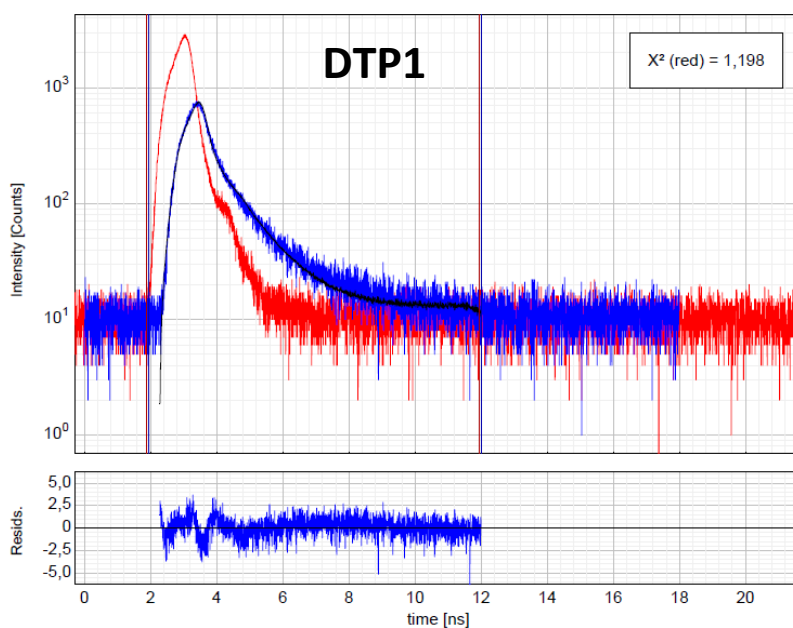

Fig. 1. Emission decays following pulsed 460 nm excitation. **DTP2** (top) and **DTP1** (bottom)
